# Supplementary material
Source: PubMed Central journal article supplement (PMC1478176)

**Supplementary Figure 1.** *Hoxb1* repression by Krox20 does not require DNA binding. A-D) lateral views of chick embryos co-electroporated with an empty vector, AdRSVSp, or expression constructs for wild type or mutant Krox20, as indicated above, and a *lacZ* reporter driven by the *EphA4* r3/r5 enhancer (a 470 bp fragment (Theil et al., 1998)).  $\beta$ -galactosidase activity was subsequently revealed by X-gal staining. Generalized *lacZ* expression occurred upon co-electroporation with the wild type *Krox20* construct, whereas the mutants do not activate the reporter. E-H) lateral views of chick embryos co-electroporated with the *Krox20* expression constructs indicated above and a *lacZ* reporter driven by the *Hoxb1* r4-spinal cord enhancer (a 2130 bp fragment (Studer et al., 1994)). Dramatic repression of *lacZ* occurred upon co-electroporation with the wild type *Krox20* expression construct as well as the S382R/D383Y mutant. In contrast the R409W mutant did not affect the expression of the reporter gene.

## References

- Studer M, Popperl H, Marshall H, Kuroiwa A and Krumlauf R (1994) Role of a conserved retinoic acid response element in rhombomere restriction of Hoxb-1. *Science*, **265**: 1728-1732.
- Theil T, Frain M, Gilardi-Hebenstreit P, Flenniken A, Charnay P and Wilkinson DG (1998) Segmental expression of the EphA4 (Sek-1) receptor tyrosine kinase in the hindbrain is under direct transcriptional control of Krox-20. *Development*, **125**: 443-452

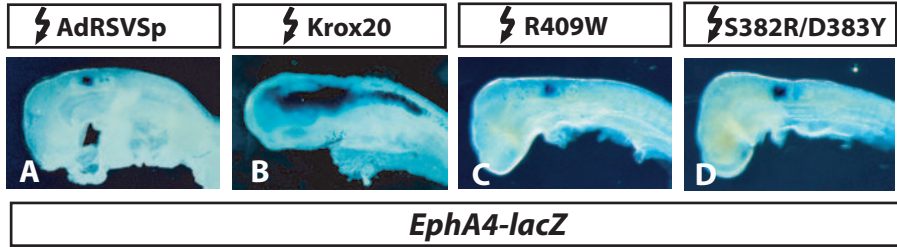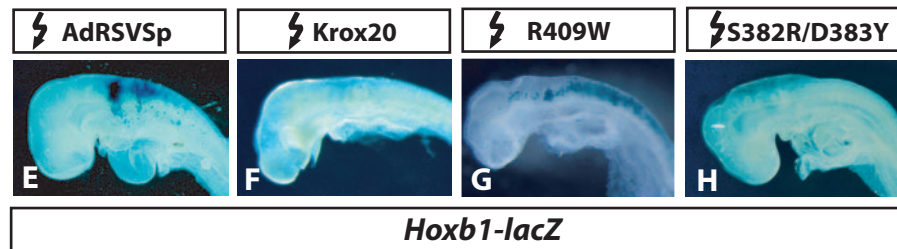

Supplement: 7601122s1.pdf [file 7601122s1.pdf]
