# Supplementary material
Source: PubMed Central journal article supplement (PMC1478176)
Supplement: 7601122s2.pdf [file 7601122s2.pdf]

**Supplementary Figure 2.** Sublocalisation of Krox20 and mutant PIASx $\beta$  proteins in the cell nucleus. COS7 cells were transfected with expression vectors encoding Krox20 and wild type or mutant HA-PIASx $\beta$  constructs, and 36 h later the proteins were revealed by immunofluorescence analysis (Krox20 is labelled with FITC, green, and HA-PIASx $\beta$  with Cy3, red). The localisation of Krox20 and PIASx $\beta$  when independently transfected are shown in Fig. 1C. Wild type PIASx $\beta$  (HA-PIAS) and PIASx $\beta$  deleted of the SAP domain (HA- $\Delta$ SAP) are co-localised with Krox20 in nuclear bodies. In contrast, with PIASx $\beta$  deleted of the proline-rich (HA- $\Delta$ Pro) region or of the SP-RING (HA- $\Delta$ RING) domain both proteins display homogeneous distributions in the nucleus.

*Krox20 + HA-PIAS*

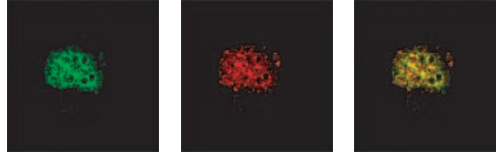

*Krox20 + HA-ΔSAP*

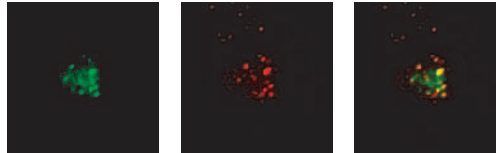

*Krox20 + HA-ΔPro*

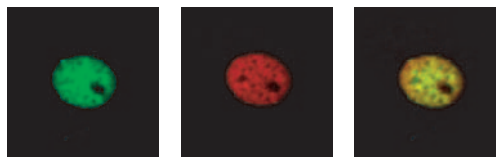

*Krox20 + HA-ΔRING*

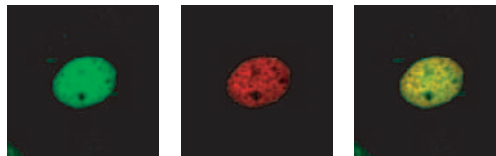

**Krox20**

**HA**

**Merge**
