# Supplementary material
Source: PubMed Central journal article supplement (PMC1478176)

**Supplementary Figure 3.** Quantitative yeast two-hybrid assay performed on PIAS proteins. PIASx $\beta$ , PIAS $\gamma$ , PIAS1 and PIAS3 fused to the GAL4 activation domain were evaluated for their capacity to bind to a Krox20-Gal4 DNA binding domain bait by measuring the expression of a *lacZ* reporter. The  $\beta$ -galactosidase activity was normalised by the level obtained with the wild-type PIASx $\beta$  construct.

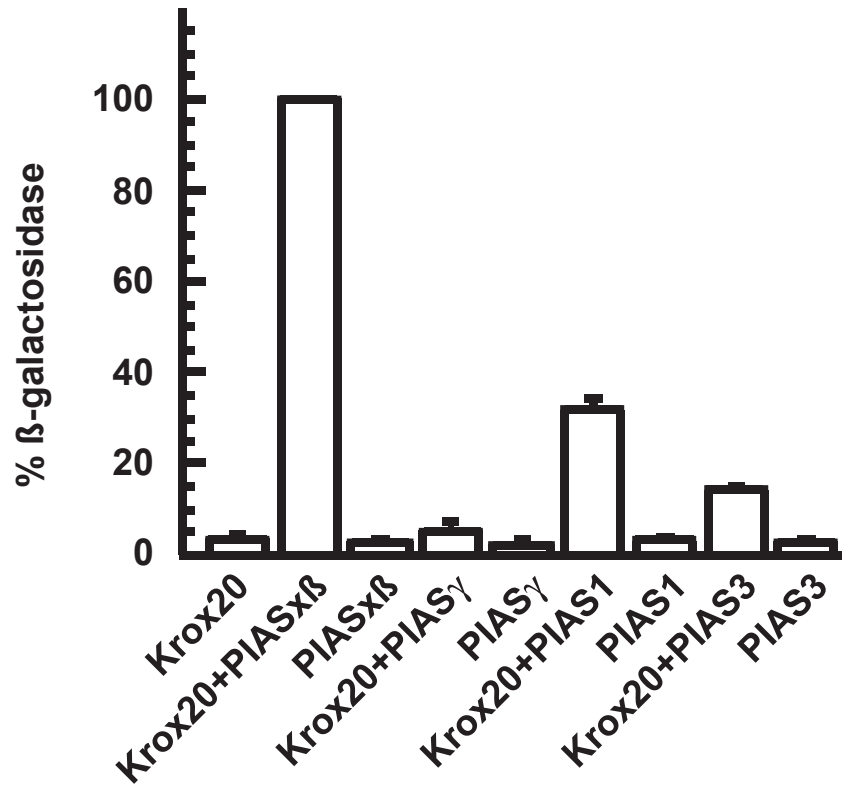

Supplement: 7601122s3.pdf [file 7601122s3.pdf]
